# Supplementary material for: Ipomoeassin-F disrupts multiple aspects of secretory protein biogenesis
Source: PubMed Central journal article supplement (PMC8173012; doi:10.1038/s41598-021-91107-4), 2021-06-02
Supplement: 41598_2021_91107_MOESM1_ESM.pdf [file 41598_2021_91107_MOESM1_ESM.pdf]

## Supplementary Information

### **Ipomoeassin-F disrupts multiple aspects of secretory protein biogenesis**

Peristera Roboti<sup>1\*</sup>, Sarah O'Keefe<sup>1</sup>, Kwabena B. Duah<sup>2</sup>, Wei Q. Shi<sup>2</sup> and Stephen High<sup>1\*</sup>

<sup>1</sup>Division of Molecular and Cellular Function, School of Biological Sciences, Faculty of Biology, Medicine and Health, The University of Manchester, Manchester M13 9PT, United Kingdom

<sup>2</sup>Department of Chemistry, Ball State University, Muncie, Indiana 47306, United States

\*corresponding authors ([peristera.roboti@manchester.ac.uk](mailto:peristera.roboti@manchester.ac.uk);  
[stephen.high@manchester.ac.uk](mailto:stephen.high@manchester.ac.uk))

**Supplementary Table 1: Primary antibodies used in this study**

| <b>Antibody</b>         | <b>Species</b> | <b>Source</b>                      | <b>Cat. No.</b> | <b>Application (dilution)</b> |
|-------------------------|----------------|------------------------------------|-----------------|-------------------------------|
| $\alpha$ - $\alpha$ 1AT | rabbit         | Dako                               | GA50561-2       | WB (1/1000)<br>IF (1/100)     |
| $\alpha$ -AFP           | chicken        | R&D Systems                        | AF1369          | WB (1/1000)<br>IF (1/100)     |
| $\alpha$ -TF            | sheep          | Philip Woodman,<br>Manchester, UK  |                 | WB (1/1000)<br>IF (1/100)     |
| $\alpha$ -FGA           | mouse          | Santa Cruz                         | sc-398806       | WB (1/1000)                   |
| $\alpha$ -apoE          | mouse          | Santa Cruz                         | sc-13521        | WB (1/1000)                   |
| $\alpha$ -ALB           | rabbit         | Sigma                              | A6684           | WB (1/1000)                   |
| $\alpha$ -Stx5          | rabbit         | Synaptic Systems                   | 110053          | WB (1/5000)                   |
| $\alpha$ -TfR           | mouse          | Invitrogen                         | 13-6800         | WB (1/1000)                   |
| $\alpha$ -OST48         | rabbit         | In house                           |                 | WB (1/1000)                   |
| $\alpha$ -Bag6          | mouse          | Abnova                             | H00007917-B01P  | WB (1/1000)                   |
| $\alpha$ -BiP           | goat           | Santa Cruz                         | sc-1051         | WB (1/1000)                   |
| $\alpha$ -GRP94         | rat            | Enzo                               | ADI-SPA-850     | WB (1/1000)                   |
| $\alpha$ -Hsp70         | mouse          | Abcam                              | ab47455         | WB (1/5000)                   |
| $\alpha$ -Hsc70         | rat            | Enzo                               | ADI-SPA-815     | WB (1/1000)                   |
| $\alpha$ -Hsp90         | rabbit         | Enzo                               | ADI-SPA-846     | WB (1/2000)                   |
| $\alpha$ -ATF4          | rabbit         | Cell Signaling                     | 11815           | WB (1/1000)                   |
| $\alpha$ -ATF6          | rabbit         | Cell Signaling                     | 65880           | WB (1/1000)                   |
| $\alpha$ -tubulin       | mouse          | Keith Gull, Oxford, UK             |                 | WB (1/1000)                   |
| $\alpha$ -TGN46         | sheep          | Vas Ponambalam,<br>Leeds, UK       |                 | IF (1/400)                    |
| $\alpha$ -CRT           | rabbit         | David H. Llewellyn,<br>Cardiff, UK |                 | IF (1/100)                    |

## Supplementary Figure 1

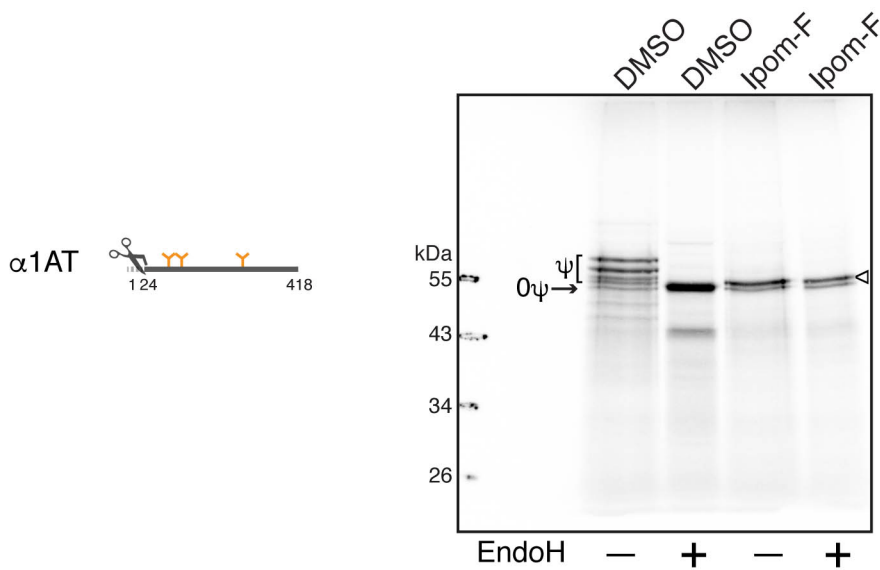

### **Supplementary Figure 1: Ipom-F reduces signal peptide-cleavage of $\alpha 1$ AT *in vitro*.**

$\alpha 1$ AT was translated in rabbit reticulocyte lysate supplemented with [ $^{35}$ S]Met/Cys, canine rough microsomes and either DMSO or Ipom-F (1  $\mu$ M). Membrane-associated products were isolated by ultracentrifugation, resolved by SDS-PAGE and analysed directly by phosphorimaging. Samples were treated with EndoH to distinguish N-glycosylated ( $\psi$ ) from non-glycosylated ( $0\psi$ ) products. Ipom-F treatment produced non-translocated, signal peptide-containing precursor forms of  $\alpha 1$ AT (arrowhead) that were non-glycosylated, and therefore EndoH-resistant. Diagram of  $\alpha 1$ AT precursor is shown on the left. The cleavage site of its N-terminal signal peptide (scissors symbol) and its endogenous N-glycosylation sites (orange Y symbols) are indicated.

## Supplementary Figure 2

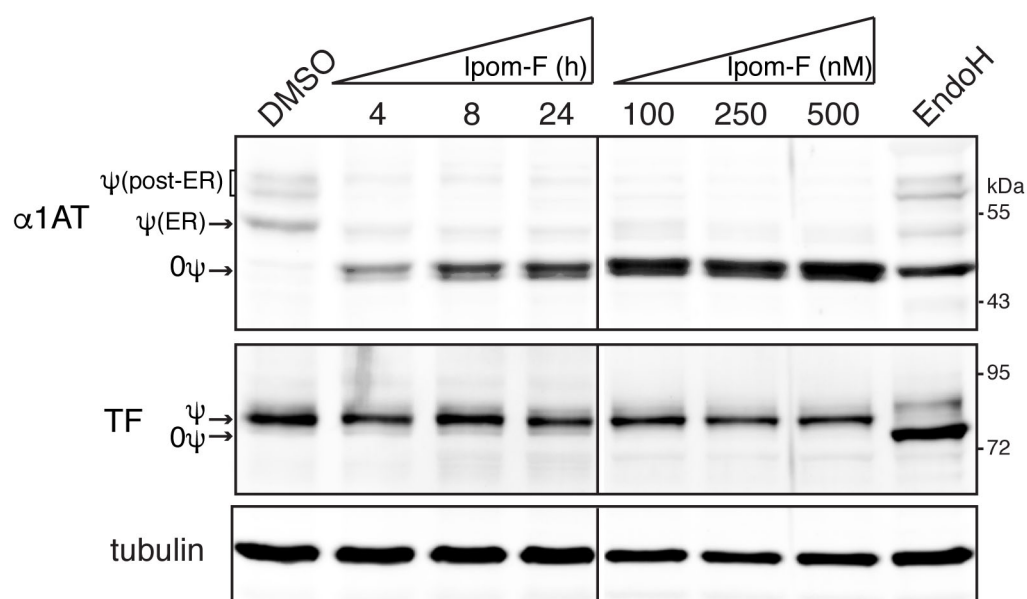

**Supplementary Figure 2: Ipom-F does not impair N-glycosylation of TF under harsh treatment conditions.** HepG2 cells were treated with DMSO, 100 nM Ipom-F over a time-course or with increasing concentrations of Ipom-F for 24 h. Clarified lysates were analysed by immunoblotting for the indicated proteins. EndoH digestion was performed to distinguish N-glycosylated ( $\psi$ ) from non-glycosylated ( $0\psi$ ) species. Post-ER, complex-glycosylated and ER resident, core-glycosylated  $\alpha 1\text{AT}$  products are shown. Solid line indicates different parts of the same gel. Full-length immunoblots are presented in Supplementary Figure 6.

## Supplementary Figure 3

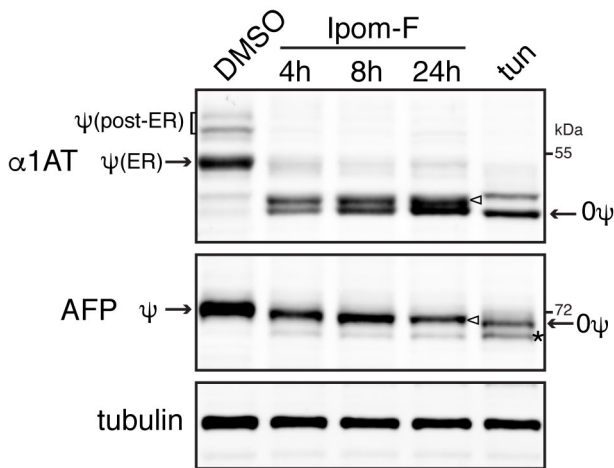

### Supplementary Figure 3: The observed Ipom-F-mediated induction of stress-inducible cytosolic chaperones correlates with the appearance of non-imported secreted protein precursors.

HepG2 cells were treated with DMSO for 24 h, tunicamycin (tun) for 17 h or Ipom-F for the indicated times. Detergent-soluble lysates were blotted for endogenous  $\alpha 1AT$  or AFP. Tunicamycin treatment effectively prevented N-glycosylation (indicated by  $\psi$ ) to yield non-glycosylated ( $0\psi$ ) species. Complex- and core-glycosylated  $\alpha 1AT$  products are shown. Non-glycosylated precursors of  $\alpha 1AT$  and AFP, whose ER import was inhibited by Ipom-F are indicated by an arrowhead. Note that these products migrate slightly slower than the corresponding ER-located precursors in tunicamycin-treated cells ( $0\psi$ ), as predicted by signal peptide cleavage of the latter. The asterisk indicates a truncated form of AFP<sup>1,2</sup>. Full-length immunoblots are presented in Supplementary Figure 6.

## Supplementary Figure 4

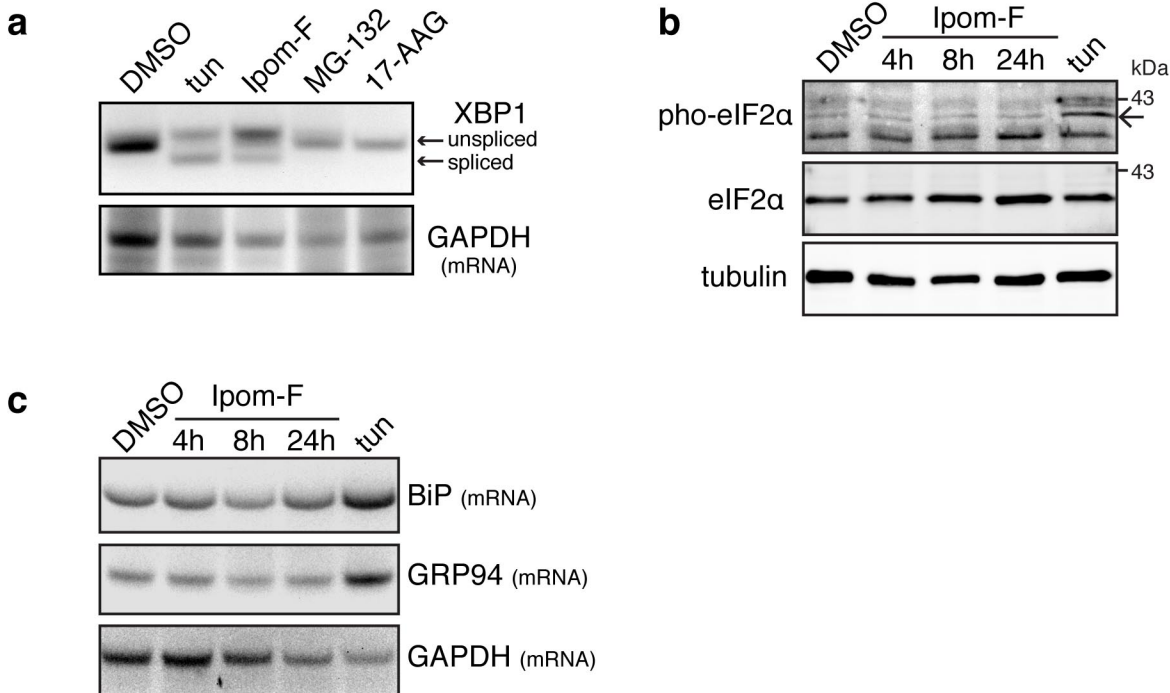

### Supplementary Figure 4: Characterisation of Ipom-F-dependent ER stress.

**(a)** Cytosolic stress induced by the proteasome inhibitor MG-132 or the Hsp90-specific inhibitor 17-AAG does not activate the UPR. HepG2 cells were treated with DMSO, Ipom-F or 17-AAG for 24 h, with tunicamycin (tun) for 12 h or MG-132 for 4 h. XBP1 mRNA splicing was determined by reverse transcription-PCR. Unspliced and spliced XBP1 mRNA are indicated. GAPDH served as a cDNA loading control. **(b)** Phosphorylation of eIF2 $\alpha$  cannot be detected in Ipom-F-treated cells. HepG2 cells were treated with DMSO for 24 h, tunicamycin (tun) for 12 h or Ipom-F for the indicated times. Detergent-soluble lysates were blotted with eIF2 $\alpha$  phospho-specific antibodies using eIF2 $\alpha$  and tubulin as loading controls. **(c)** ER stress triggered by Ipom-F-mediated Sec61 blockade does not cause transcriptional upregulation of BiP and GRP94. HepG2 cells were treated with DMSO for 24 h, tunicamycin (tun) for 12 h or Ipom-F for the indicated times. RNA was isolated from cells and mRNA levels of BiP and GRP94 was determined by reverse transcription-PCR. GAPDH served as a cDNA loading control. Full-length immunoblots and agarose gels are presented in Supplementary Figures 6 and 7, respectively.

# Supplementary Figure 5

related to Figure 1a

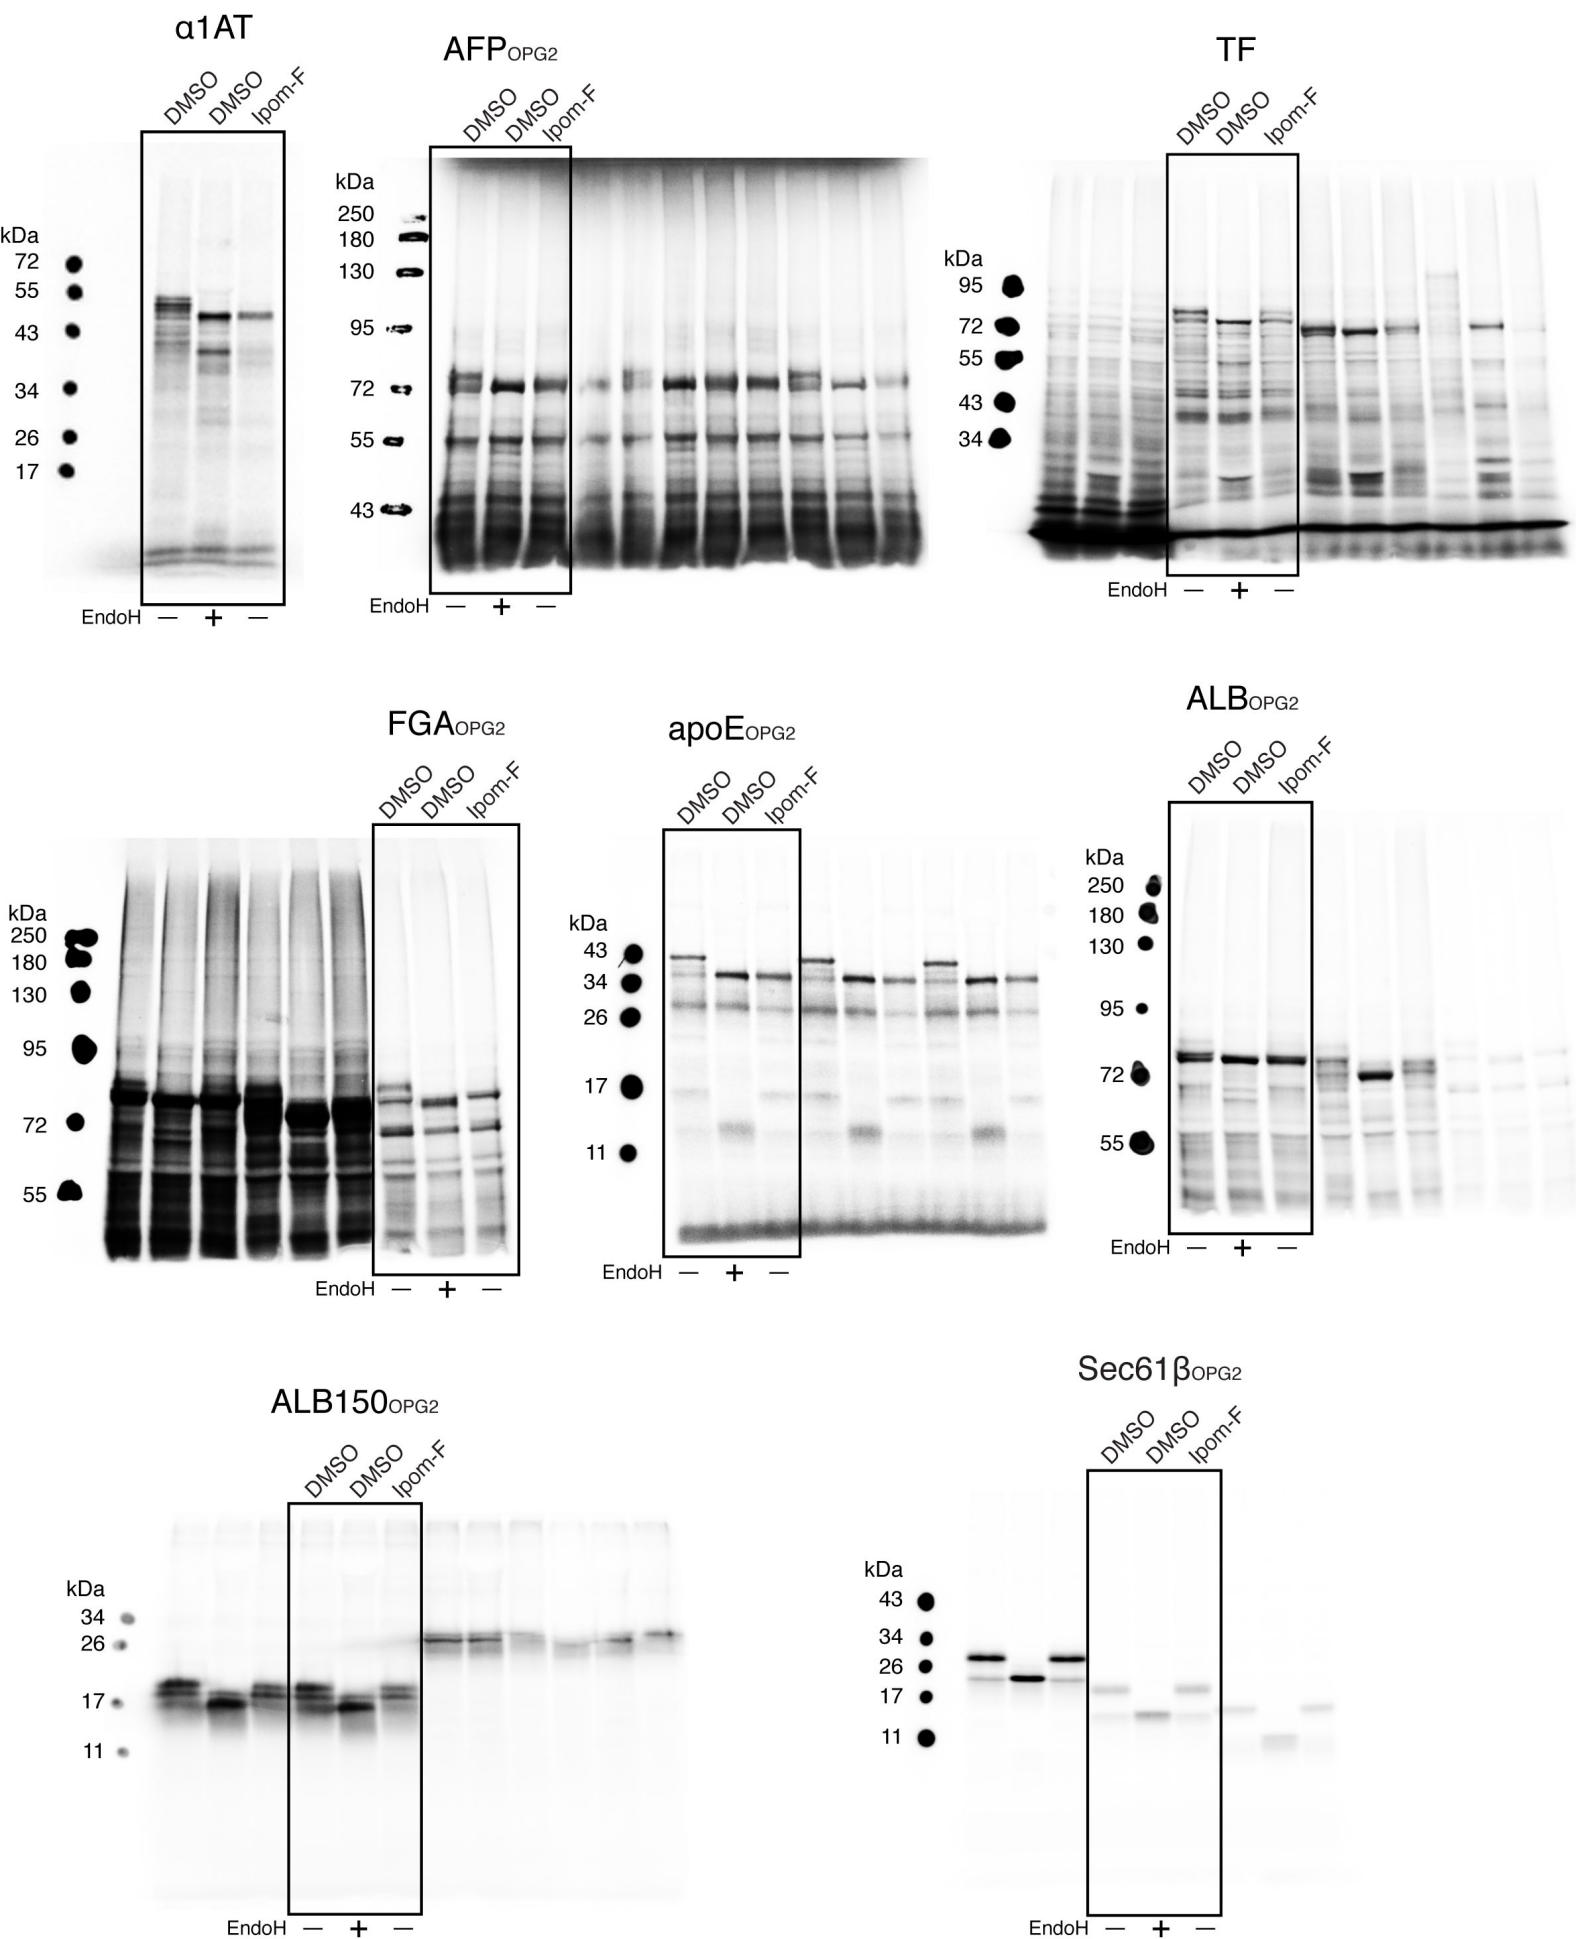

# Supplementary Figure 5 (continued)

related to Figure 7a

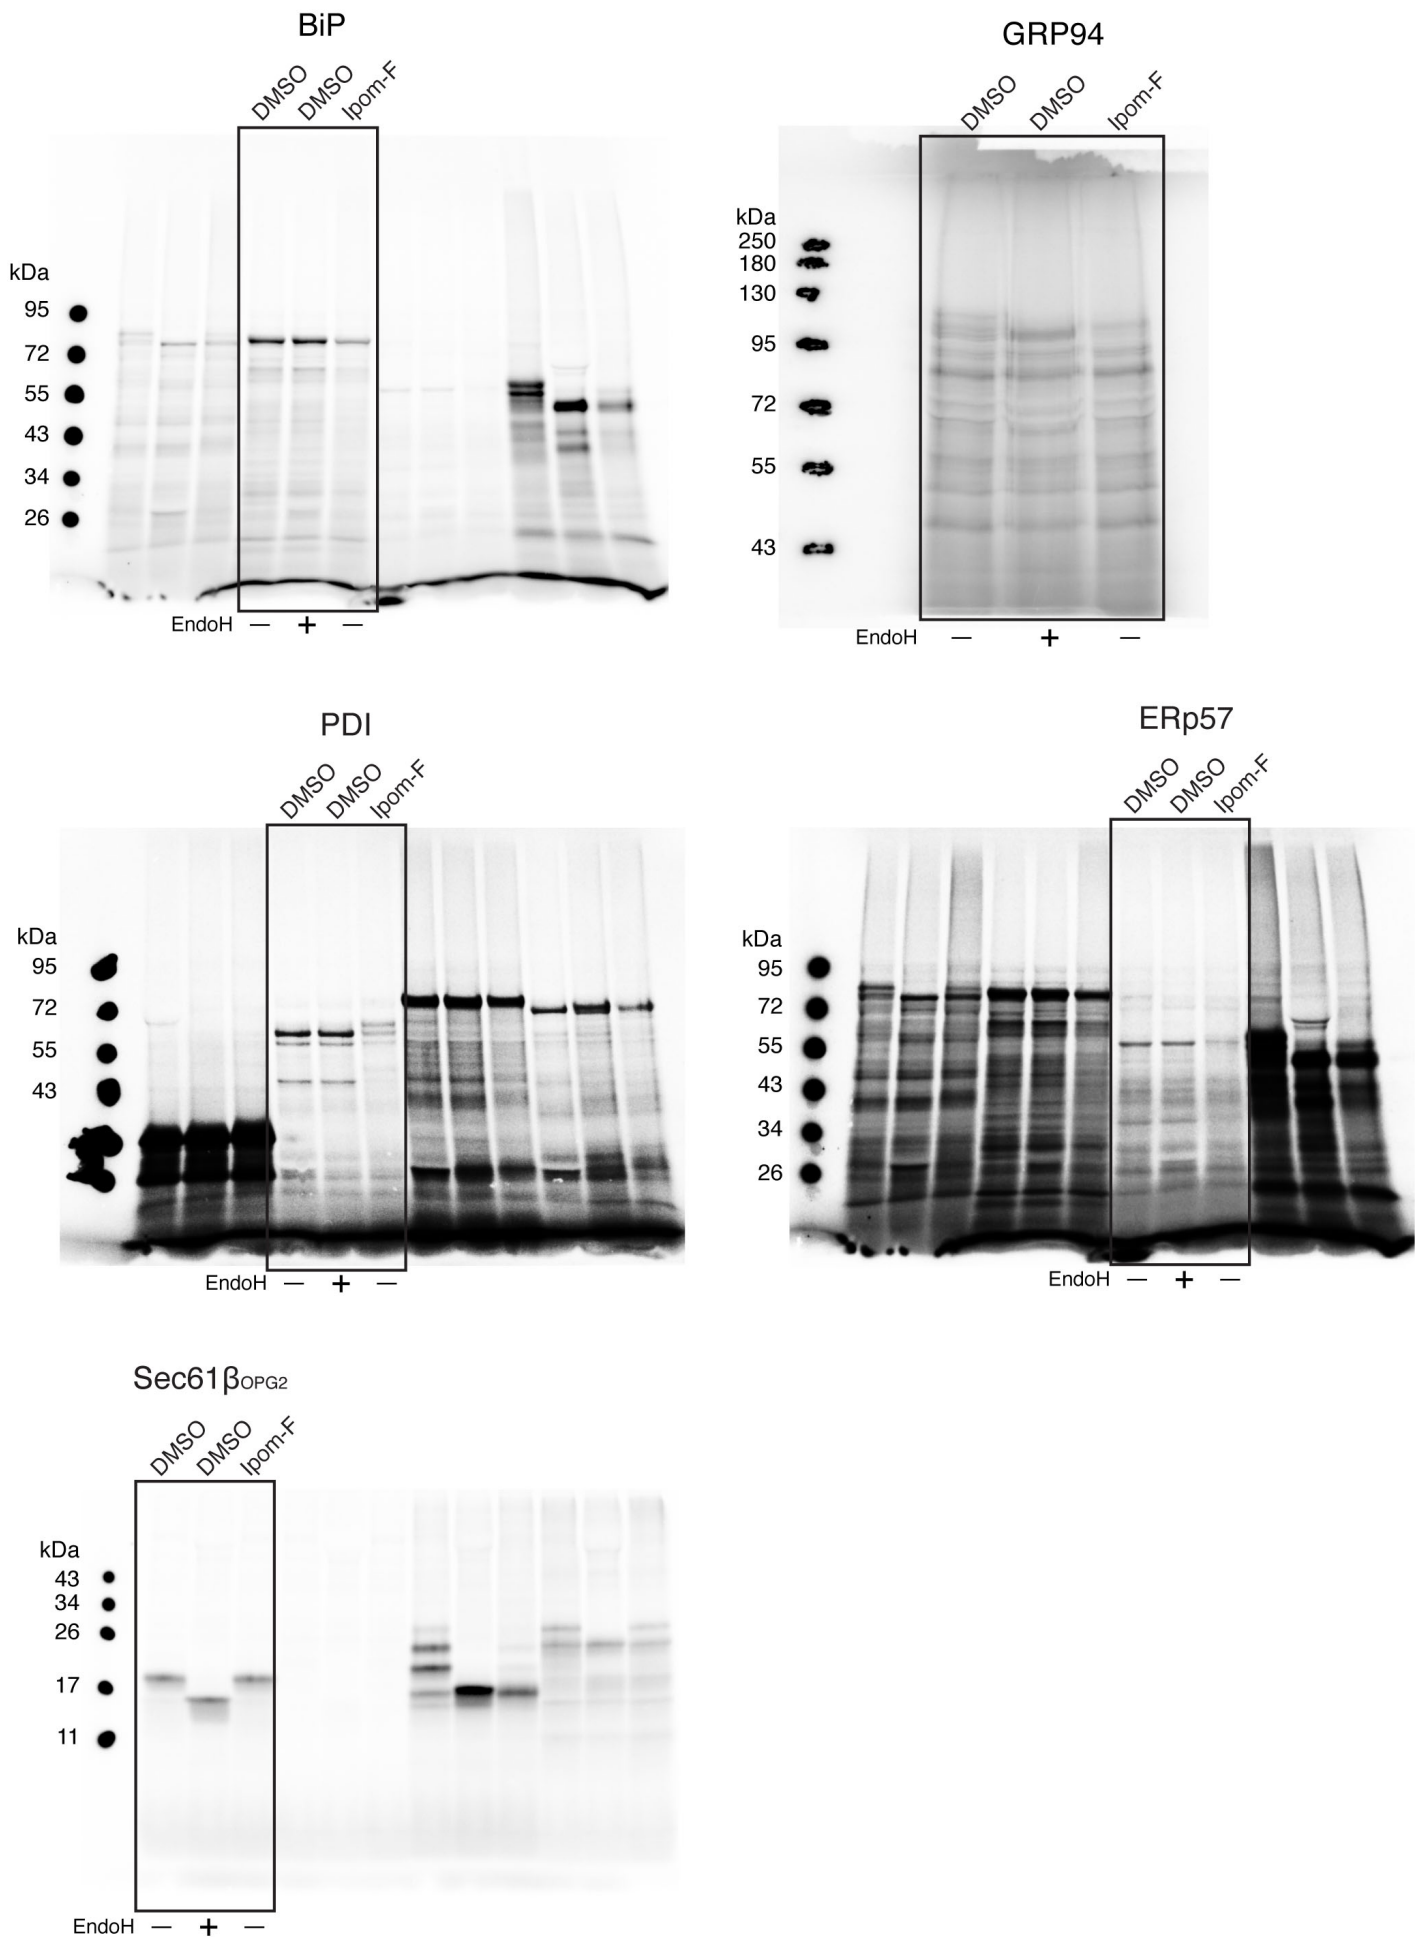

Supplementary Figure 5: Full-length phosphorimaging exposures from Figures 1a and 7a.



# Supplementary Figure 6

related to Figure 2a

### Blot #1

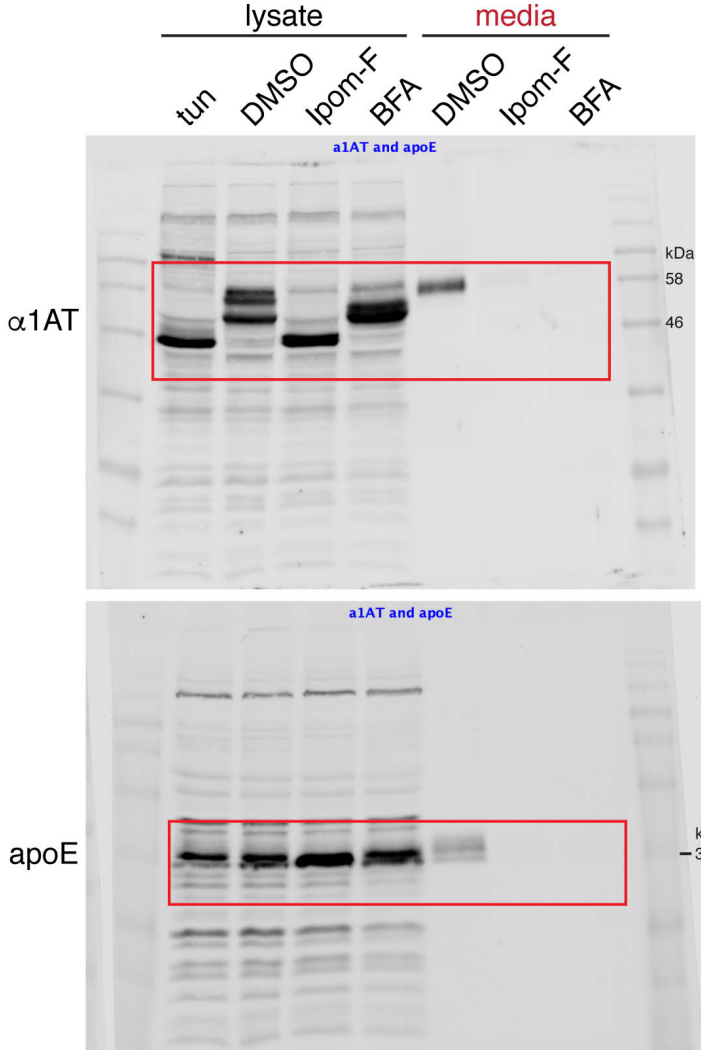

### Blot #2

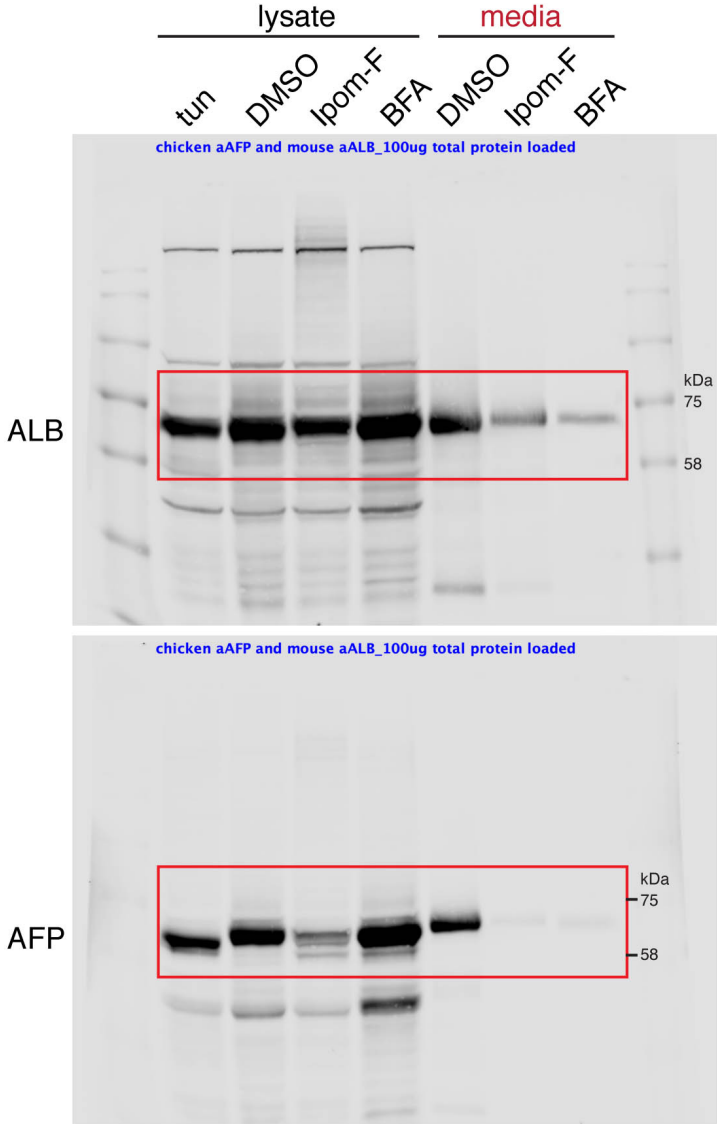

### Blot #3

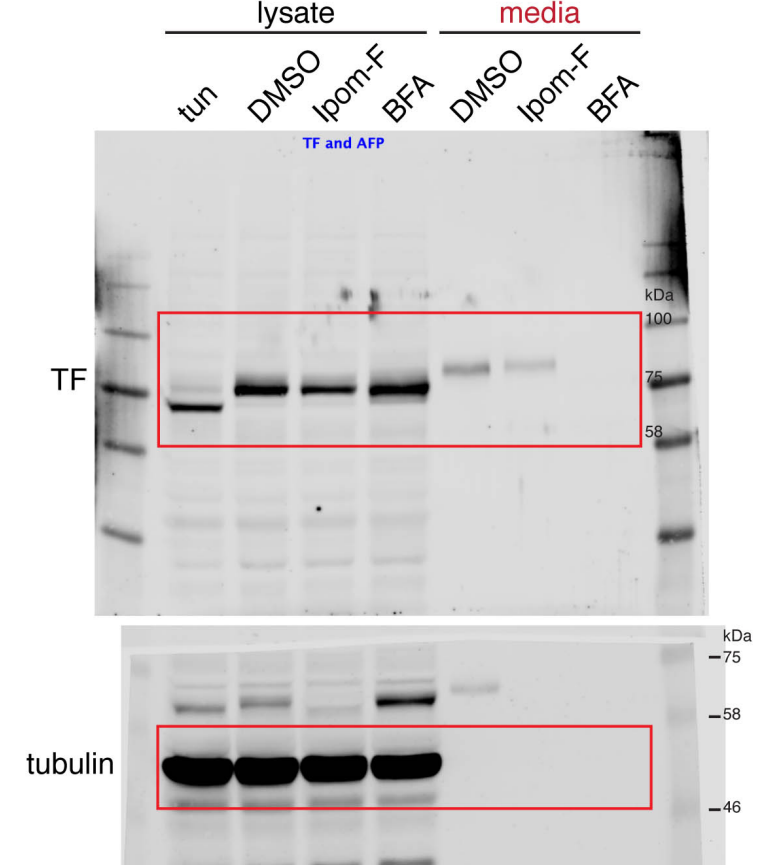

### Blot #4

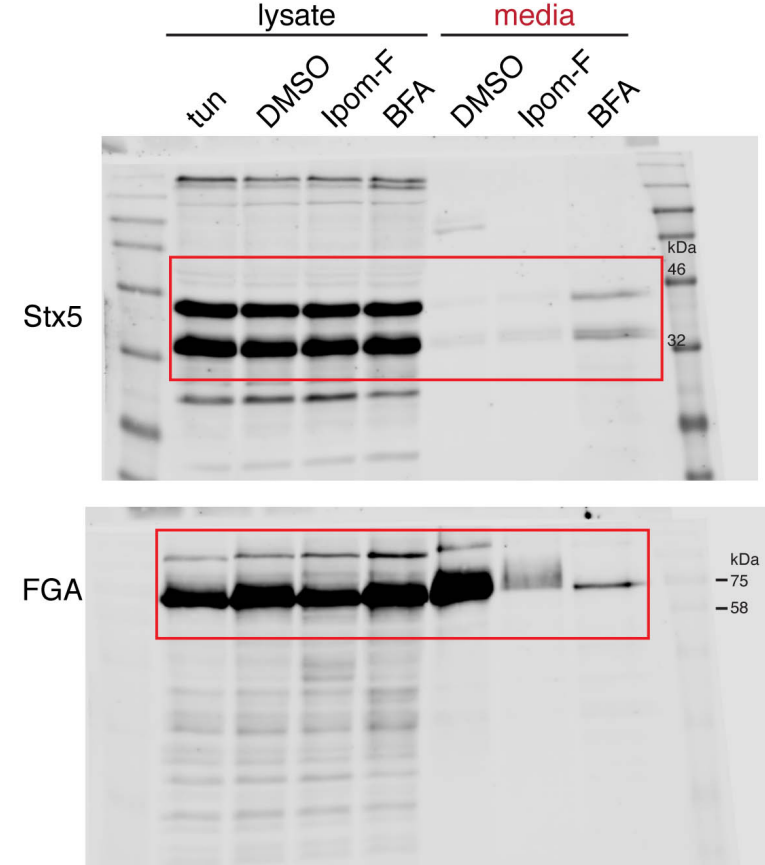

# Supplementary Figure 6 (continued)

related to Figure 3a

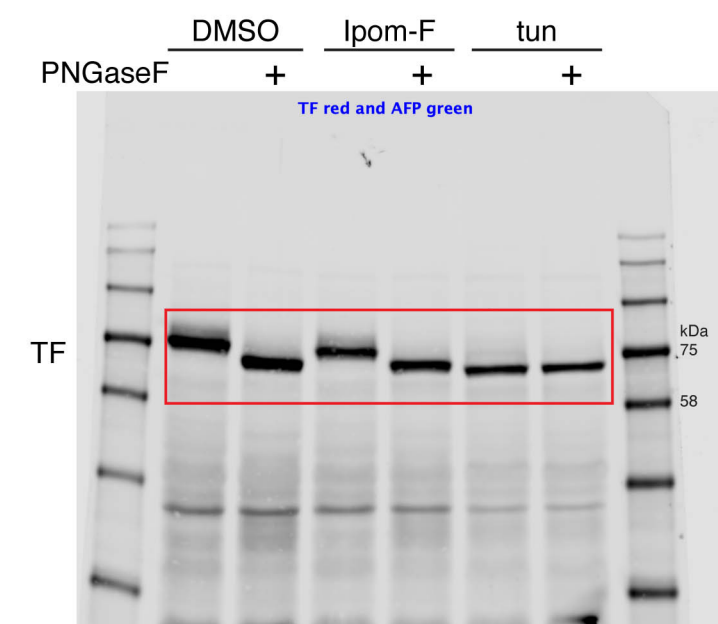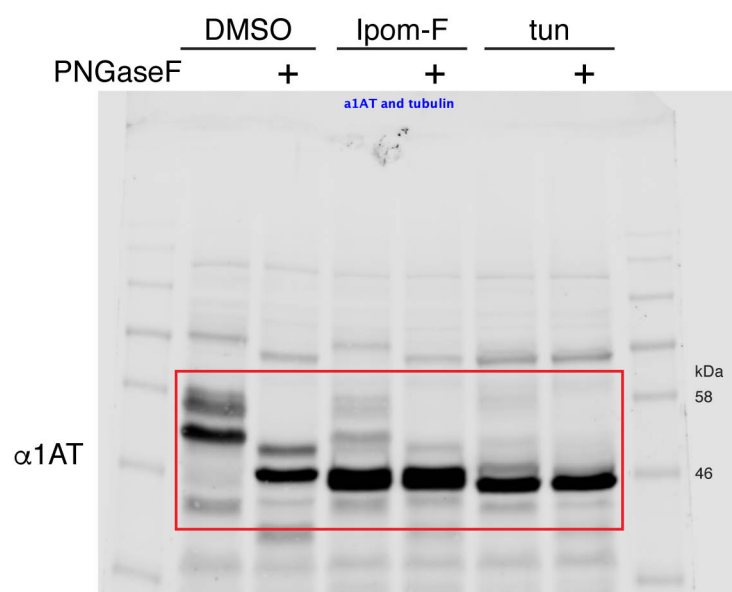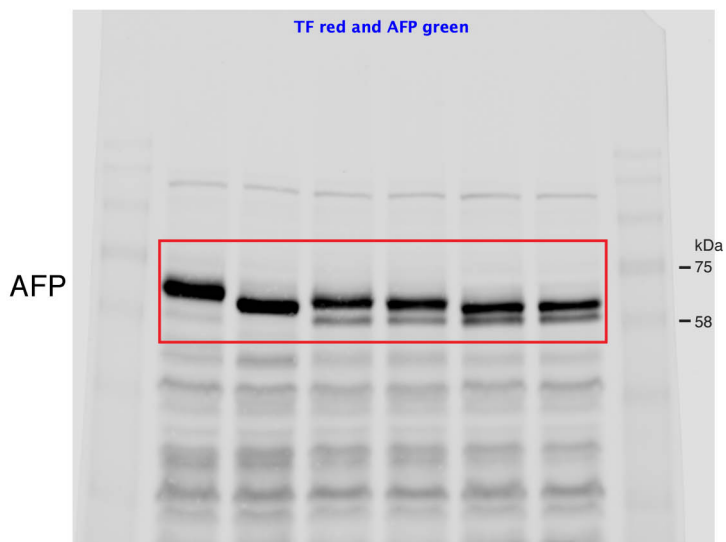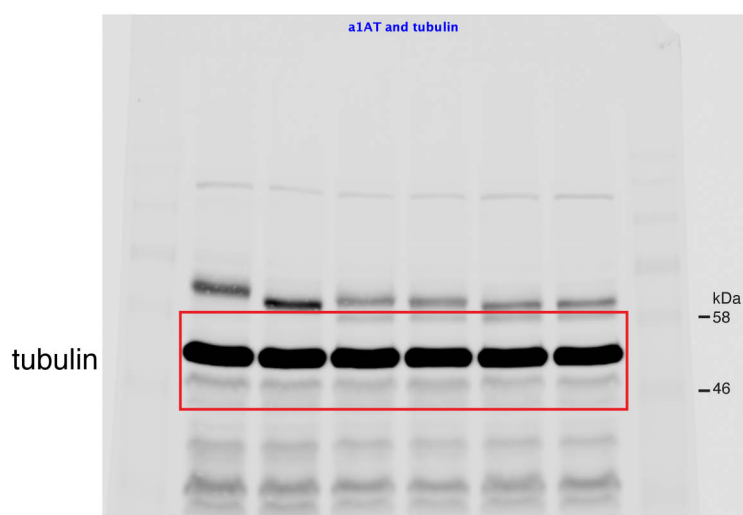

# Supplementary Figure 6 (continued)

related to Figure 4a

Blot #1

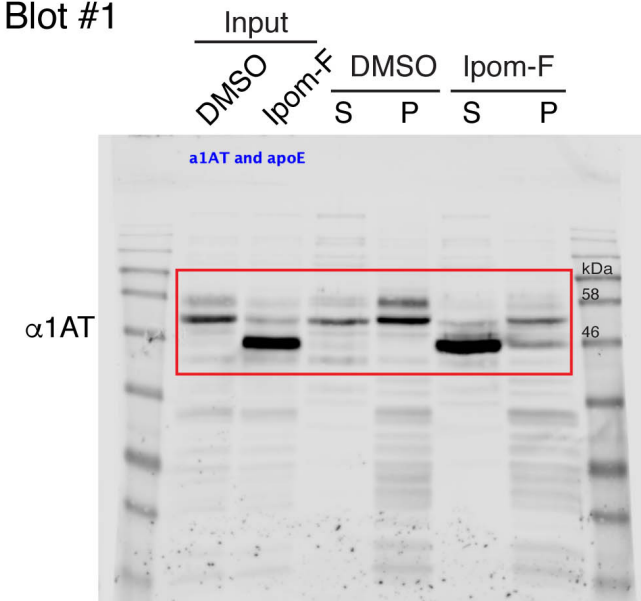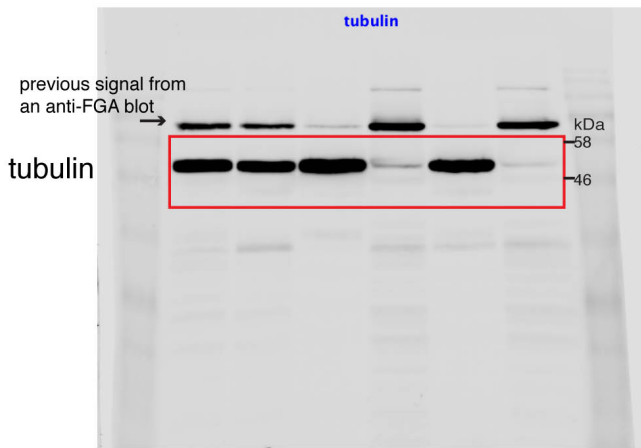

Blot #2

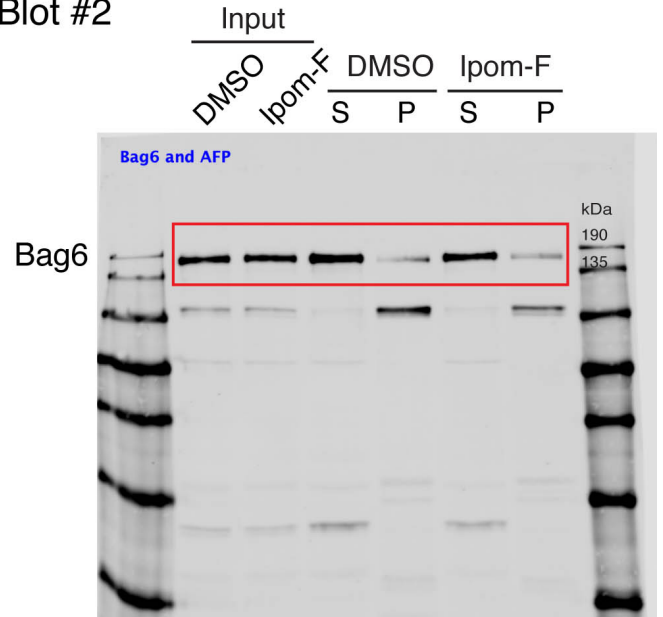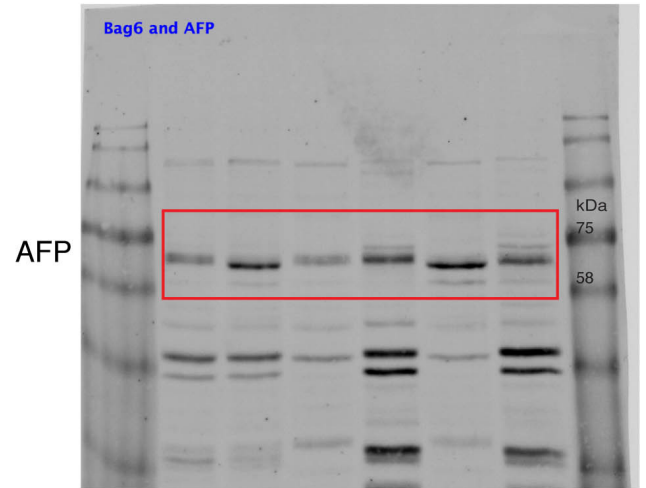

Blot #3

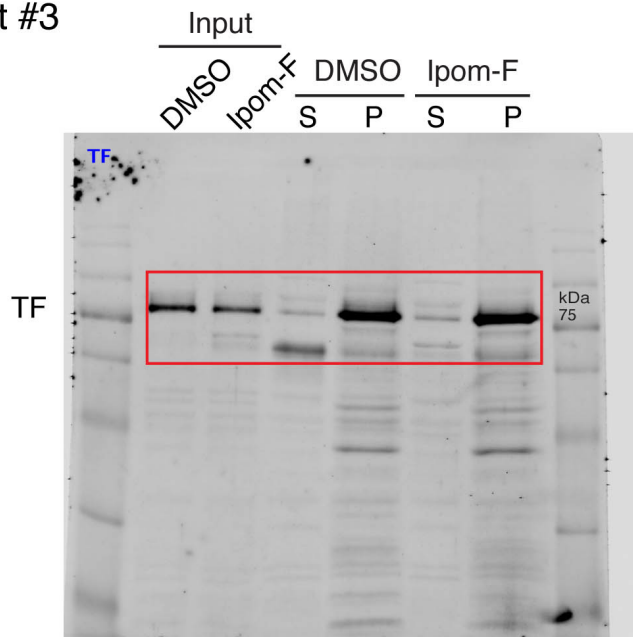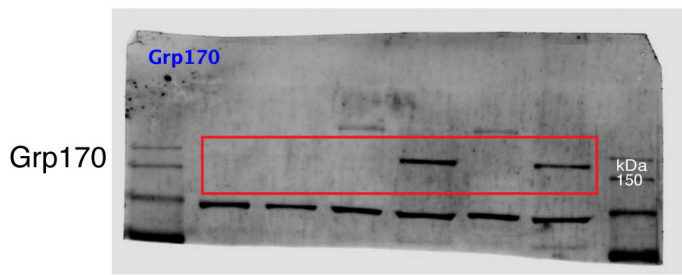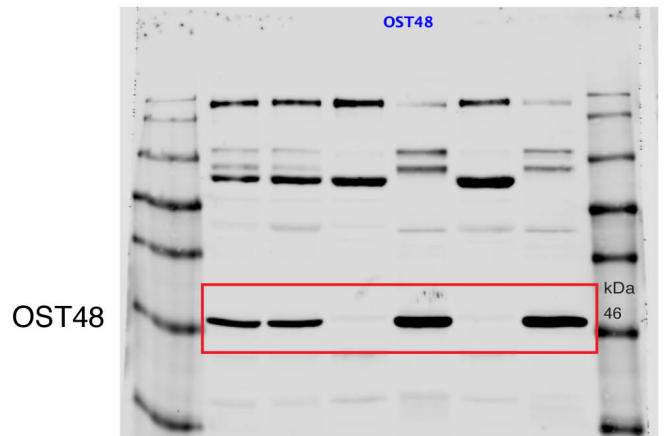

# Supplementary Figure 6 (continued)

related to Figure 4c

Blot #1

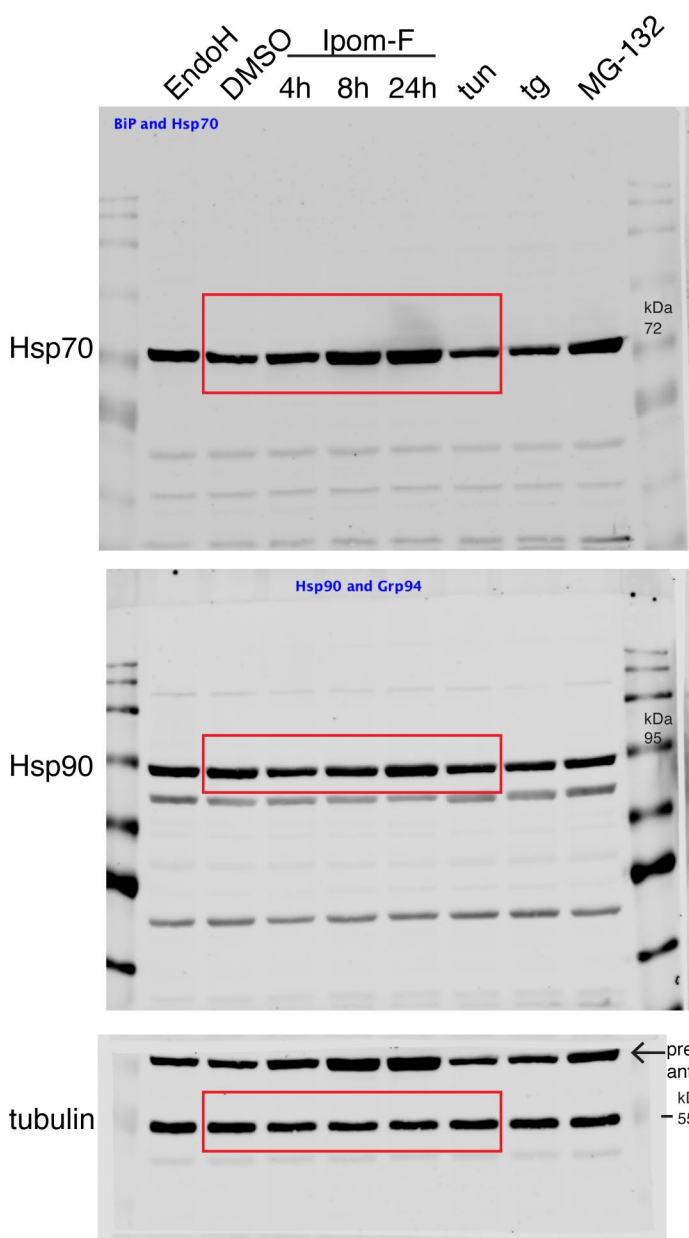

Blot #2

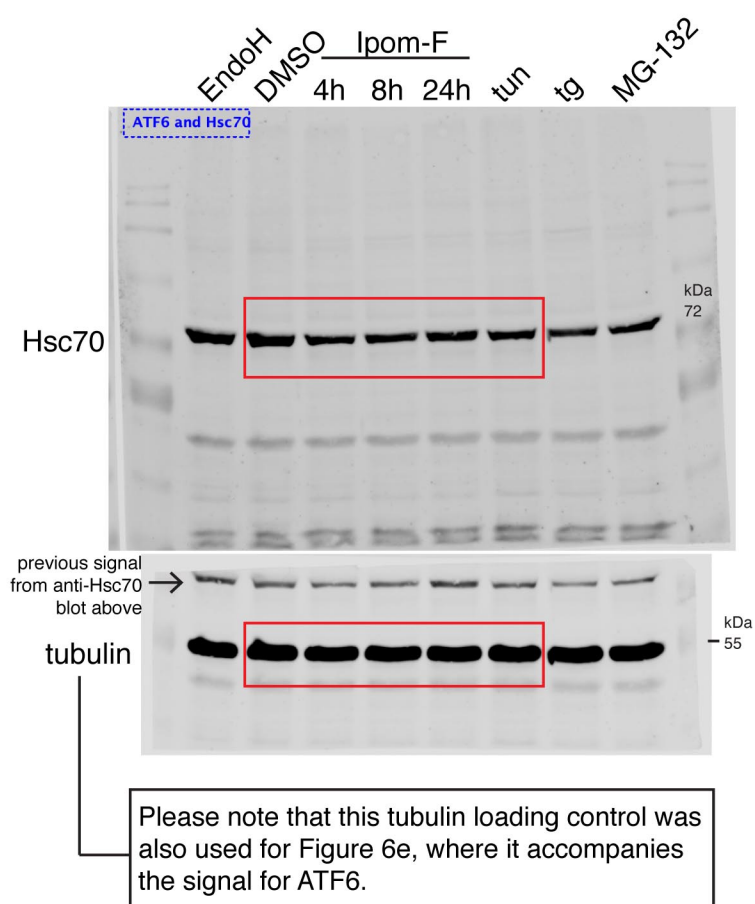

# Supplementary Figure 6 (continued)

related to Figure 5a

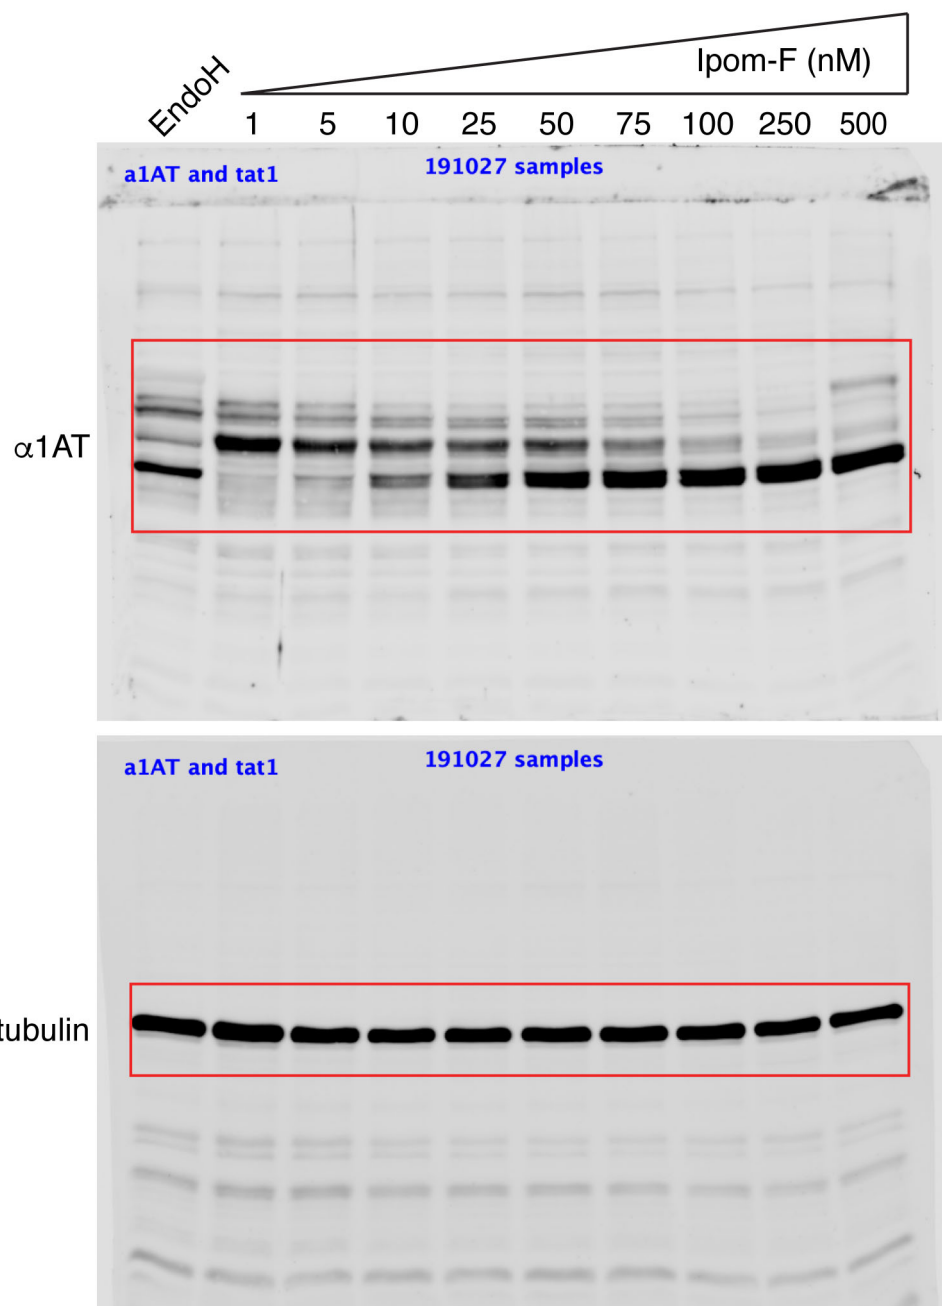

# Supplementary Figure 6 (continued)

related to Figure 6b

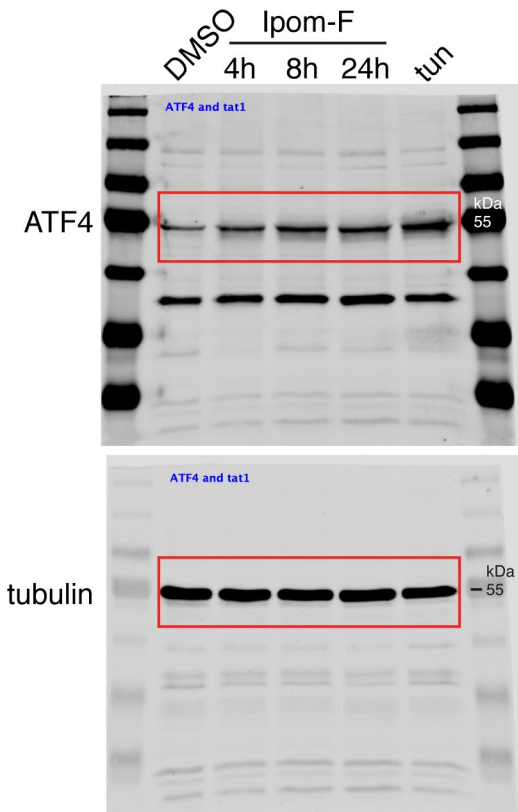

related to Figure 6c

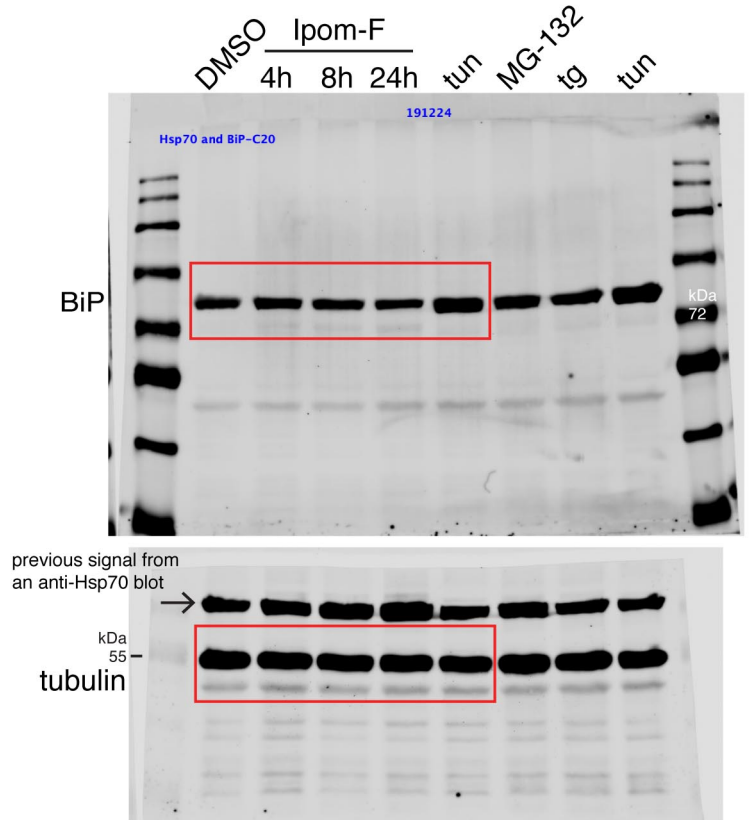

related to Figure 6d

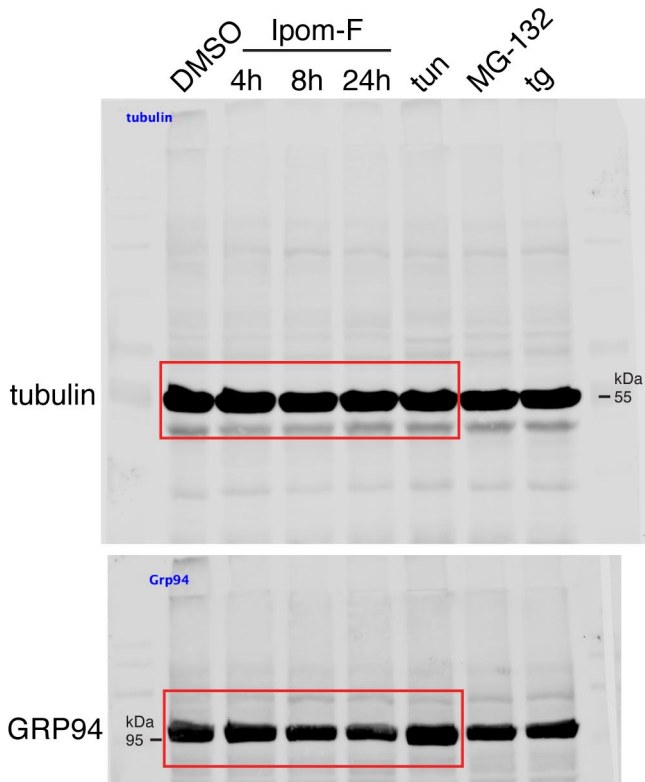

related to Figure 6e

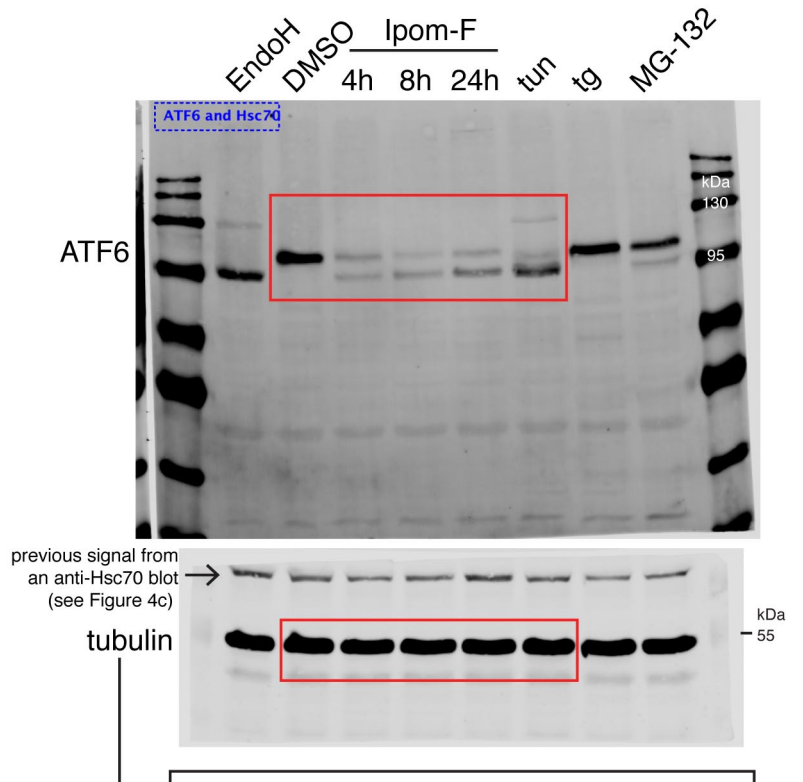

Please note that this tubulin loading control was also used for Figure 4c, where it accompanies the signal for Hsc70.

# Supplementary Figure 6 (continued)

related to Supplementary Figure 2

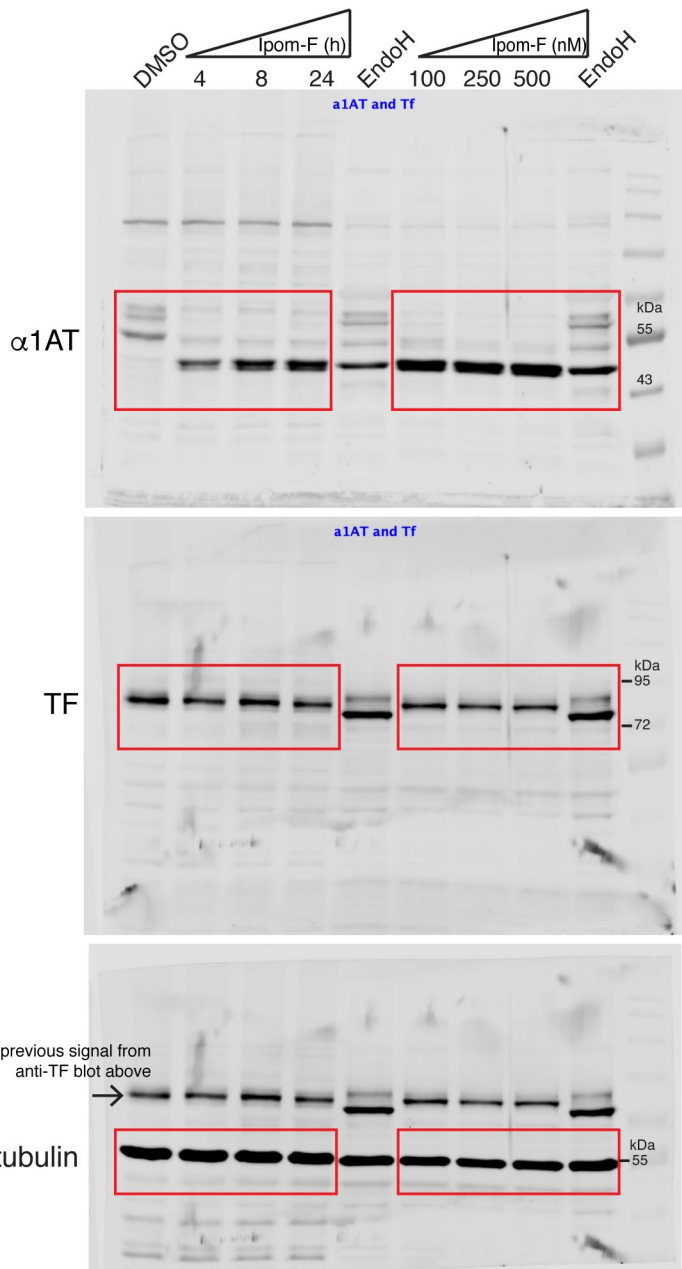

related to Supplementary Figure 3

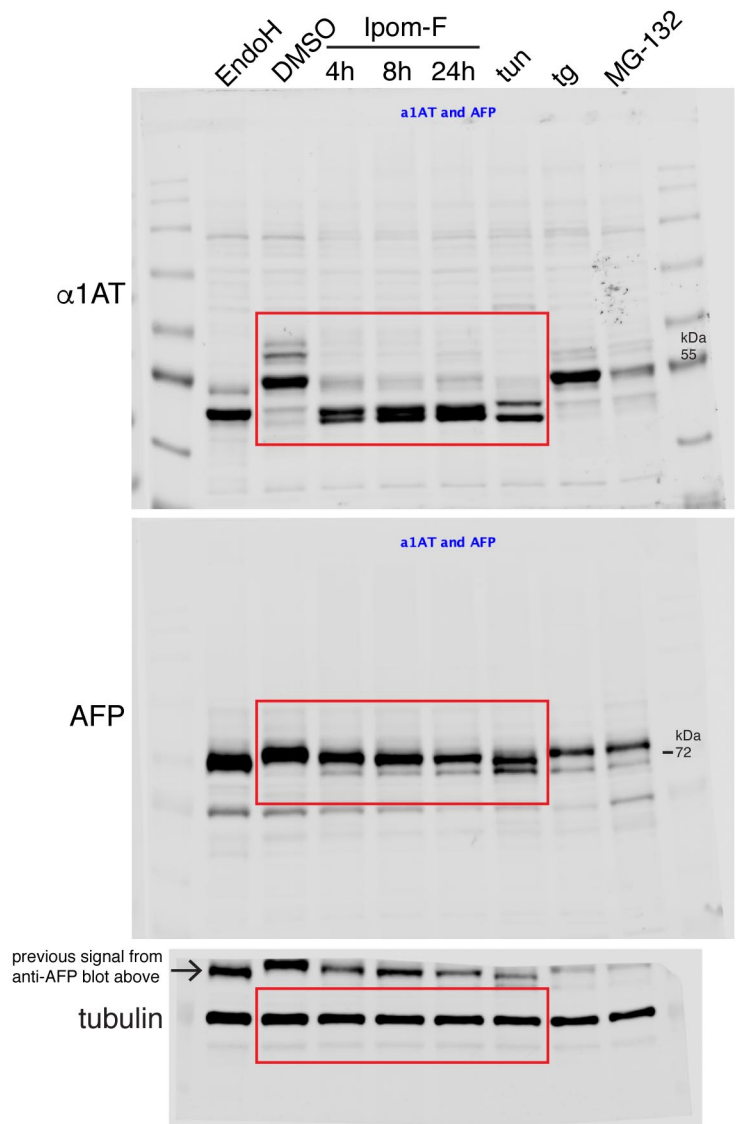

# Supplementary Figure 6 (continued)

related to Supplementary Figure 4b

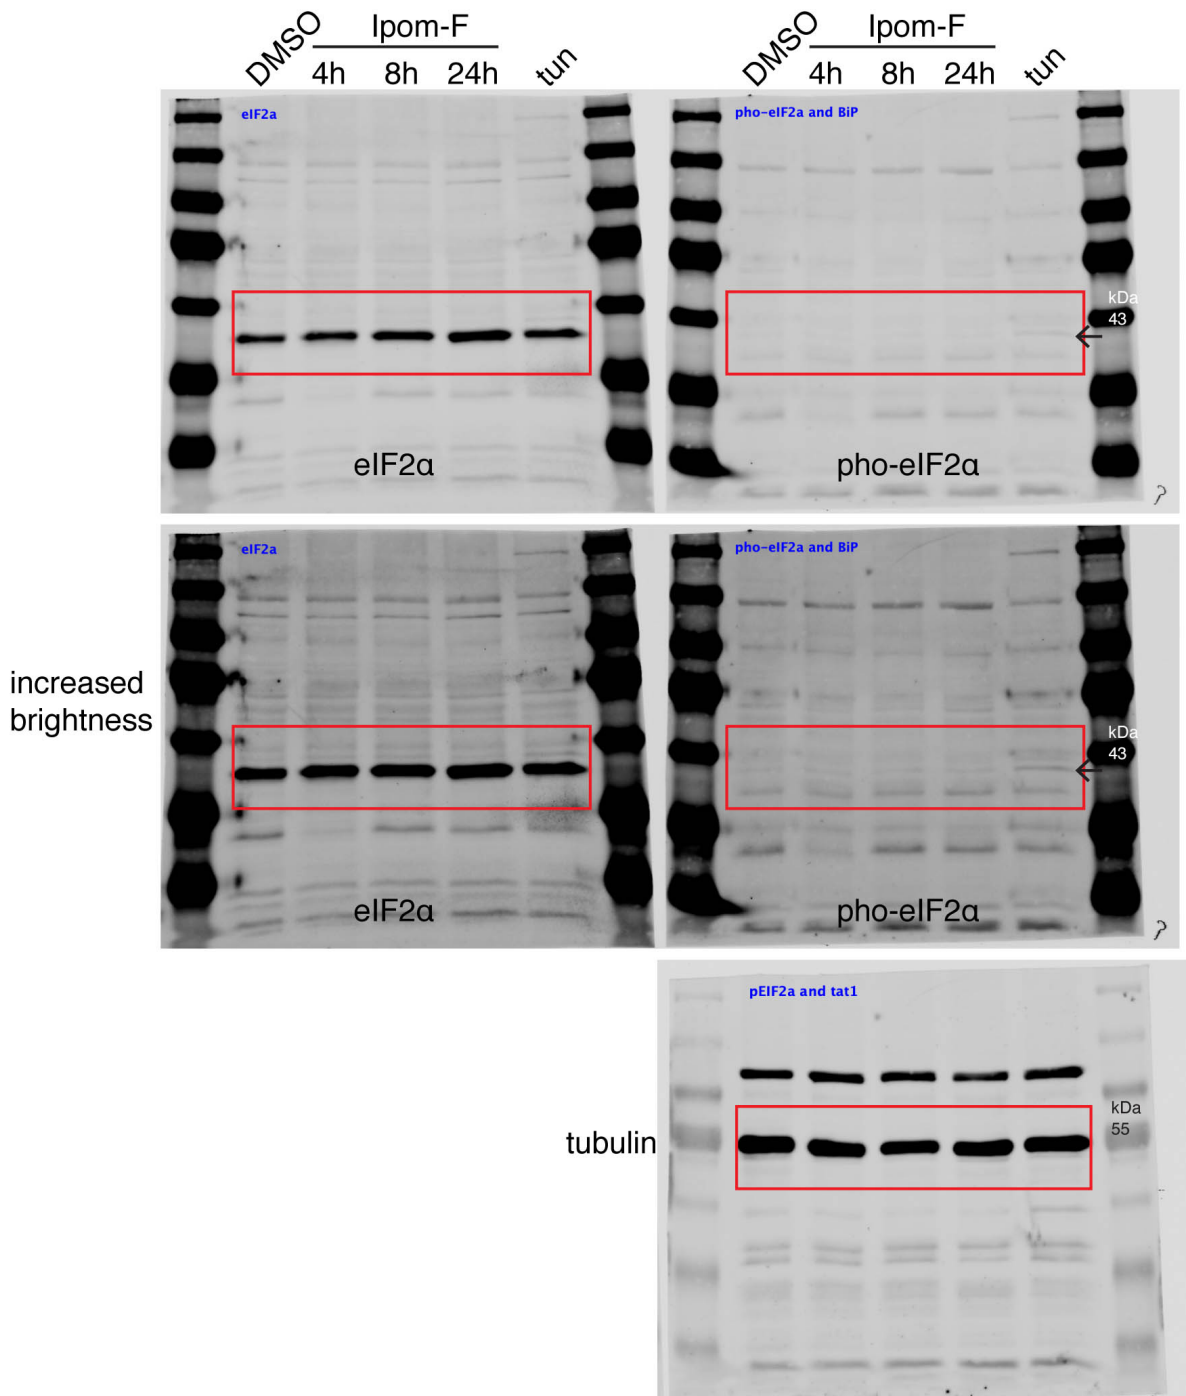

**Supplementary Figure 6:** Full-length, infrared-based scans of immunoblots from the indicated main and supplementary figures. The brightness of the entire scans was generally increased so that borders of membranes are easier to see. Please note that for Figures 4c and 6e, the same membrane was incubated with rat anti-Hsc70 and rabbit anti-ATF6 antibodies (two-colour detection system with Odyssey Infrared Imager), and therefore the same anti-tubulin immunoblot is shown in both figures.



# Supplementary Figure 7

related to Figure 6a

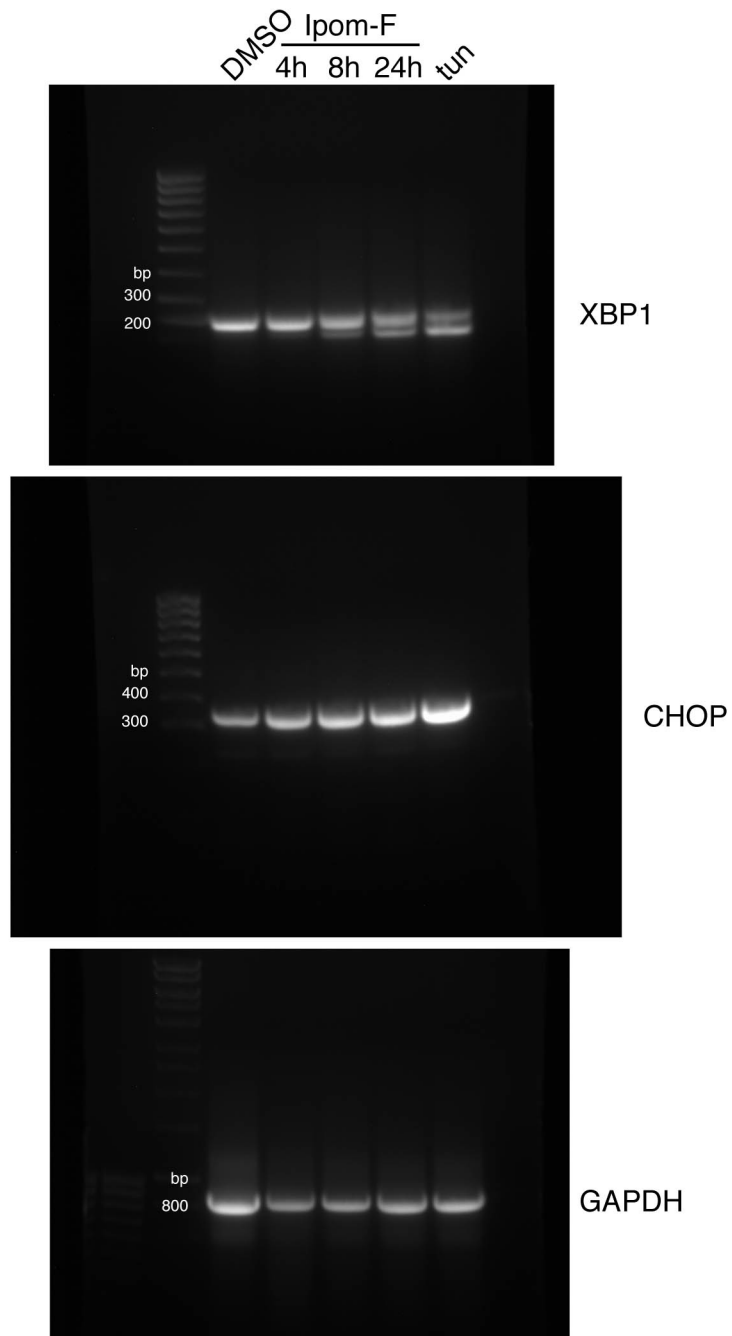

# Supplementary Figure 7 (continued)

related to Supplementary Figure 4a

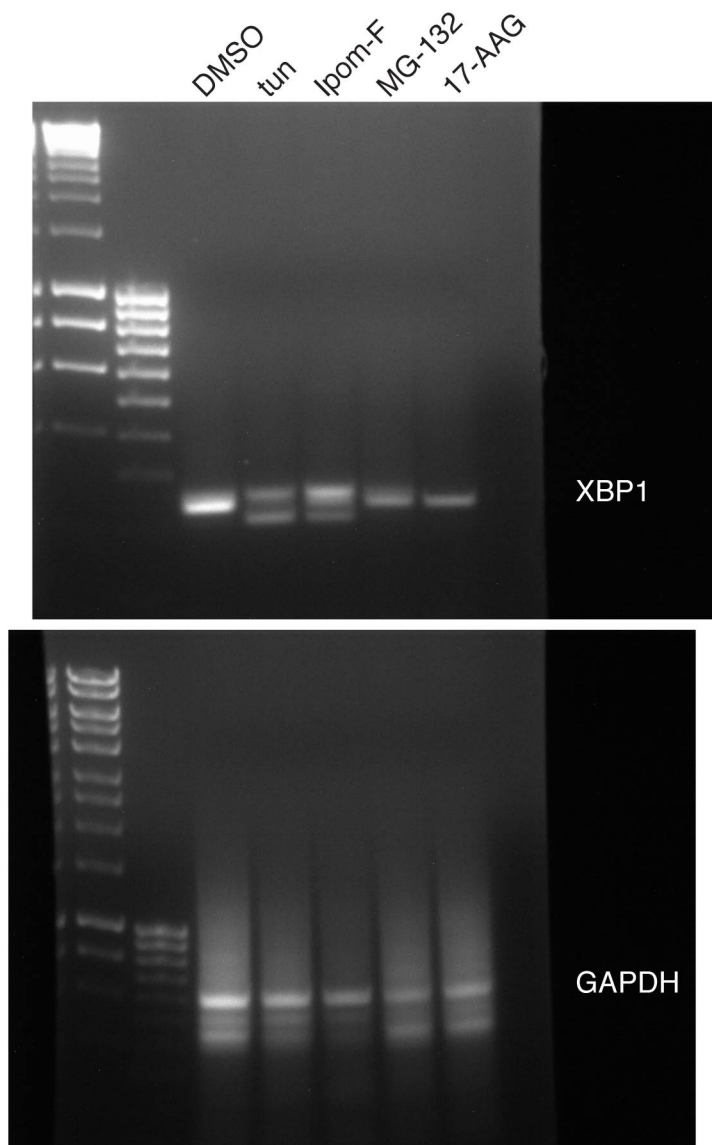

related to Supplementary Figure 4c

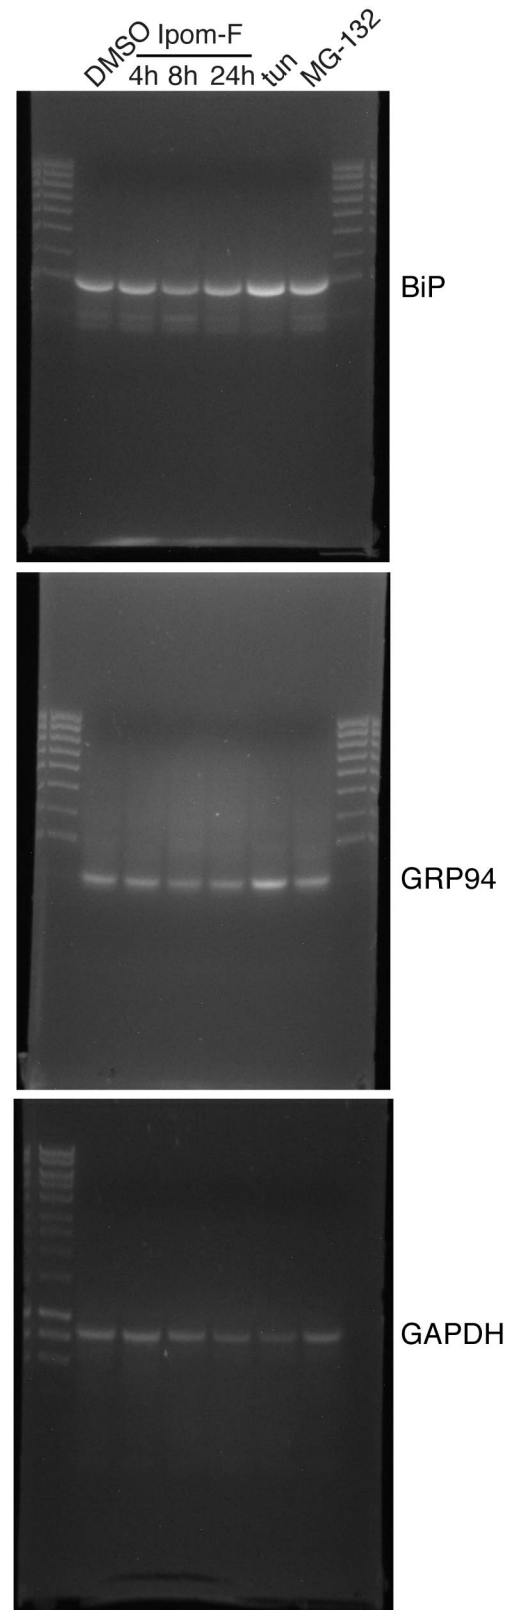

**Supplementary Figure 7:** Full-length scans of agarose gels from Figure 6a and Supplementary Figure 4a and c.

- 1 Deutsch, H. F., Taniguchi, N. & Evenson, M. A. Isolation and properties of human alpha-fetoprotein from HepG2 cell cultures. *Tumour Biol* **21**, 267-277, doi:10.1159/000030132 (2000).
- 2 Chou, J. Y. & Savitz, A. J. alpha-Fetoprotein synthesis in transformed fetal rat liver cells. *Biochem Biophys Res Commun* **135**, 844-851, doi:10.1016/0006-291x(86)91005-3 (1986).
